# Supplementary material for: Twenty-Five Years of American Education: An Interpretation.
Source: Royal Society of Chemistry journal article supplement (doi:10.1039/c9ra07485f), 1982-09-28
Supplement: c9ra07485f1.pdf [file c9ra07485f1.pdf]

### Electronic supplementary materials

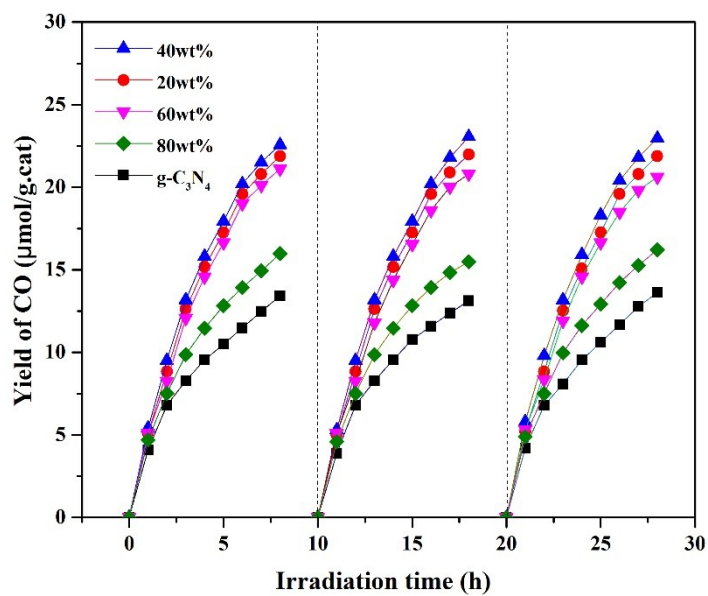

Fig. S1 Cycle characteristic diagram for all composites and pure g-C<sub>3</sub>N<sub>4</sub>.
